# Supplementary material for: Proteomics changes in adhesion molecules: a driving force for vascular smooth muscle cell phenotypic switch
Source: Royal Society of Chemistry journal article supplement (doi:10.1039/c2mb05470a), 2012-01-04
Supplement: c2mb05470a.pdf [file c2mb05470a.pdf]

| <b>Protein Name</b>                                                      | <b>Accession Number</b> | <b>Protein PI</b> | <b>Peptide Count</b> | <b>Total Ion Score</b> |
|--------------------------------------------------------------------------|-------------------------|-------------------|----------------------|------------------------|
| 10 kDa heat shock protein, mitochondrial                                 | P61604                  | 8,89              | 2                    | 89,47                  |
| 14-3-3 protein zeta/delta                                                | P29361                  | 4,77              | 2                    | 71,89                  |
| 28 kDa heat- and acid-stable phosphoprotein                              | Q13442                  | 8,84              | 4                    | 150,30                 |
| 28S ribosomal protein S15, mitochondrial                                 | Q9DC71                  | 10,13             | 3                    | 74,61                  |
| 40S ribosomal protein S10                                                | P46783                  | 10,15             | 5                    | 178,96                 |
| 40S ribosomal protein S12                                                | P25398                  | 6,81              | 3                    | 133,25                 |
| 40S ribosomal protein S18                                                | Q5TJE9                  | 10,99             | 5                    | 107,09                 |
| 40S ribosomal protein S19 (Fragment)                                     | Q29308                  | 10,2              | 8                    | 286,11                 |
| 40S ribosomal protein S19                                                | P39019                  | 10,31             | 8                    | 322,69                 |
| 40S ribosomal protein S21                                                | P63220                  | 8,68              | 3                    | 102,63                 |
| 40S ribosomal protein S29                                                | P62273                  | 10,17             | 5                    | 165,20                 |
| 40S ribosomal protein S30                                                | P62860                  | 12,15             | 3                    | 116,07                 |
| 40S ribosomal protein S5                                                 | P46782                  | 9,73              | 3                    | 137,66                 |
| 40S ribosomal protein SA                                                 | Q2L9X0                  | 4,8               | 4                    | 131,97                 |
| 60 kDa heat shock protein, mitochondrial                                 | P10809                  | 5,7               | 4                    | 170,52                 |
| 60S acidic ribosomal protein P2                                          | P05387                  | 4,42              | 3                    | 107,15                 |
| 60S ribosomal protein L12                                                | Q6QMZ7                  | 9,48              | 1                    | 64,42                  |
| 60S ribosomal protein L13                                                | Q56JZ1                  | 11,59             | 4                    | 75,84                  |
| 60S ribosomal protein L24                                                | Q66WF5                  | 11,26             | 4                    | 86,30                  |
| 60S ribosomal protein L26                                                | P61254                  | 10,55             | 4                    | 120,74                 |
| 60S ribosomal protein L26-like 1                                         | Q9UNX3                  | 10,55             | 3                    | 72,65                  |
| 60S ribosomal protein L27                                                | P61357                  | 10,56             | 3                    | 73,50                  |
| 60S ribosomal protein L31                                                | P62899                  | 10,54             | 2                    | 51,34                  |
| 60S ribosomal protein L36                                                | Q9Y3U8                  | 11,59             | 1                    | 58,63                  |
| 60S ribosomal protein L6                                                 | Q2YGT9                  | 10,73             | 3                    | 132,37                 |
| 78 kDa glucose-regulated protein                                         | Q3S4T7                  | 5,07              | 17                   | 671,28                 |
| Abnormal spindle-like microcephaly-associated protein homolog (Fragment) | P62297                  | 11,06             | 20                   | 158,21                 |
| Actin, alpha cardiac muscle 1                                            | P68032                  | 5,23              | 12                   | 796,27                 |
| Actin, aortic smooth muscle                                              | P62736                  | 5,23              | 12                   | 789,44                 |
| Actin, cytoplasmic 1                                                     | O18840                  | 5,29              | 13                   | 888,06                 |

|                                                                        |        |      |    |         |
|------------------------------------------------------------------------|--------|------|----|---------|
| Actin-related protein 2/3 complex subunit 4                            | P59998 | 8,53 | 1  | 44,36   |
| Activated RNA polymerase II transcriptional coactivator p15            | Q4R947 | 9,6  | 2  | 60,50   |
| Adenylyl cyclase-associated protein 1                                  | Q3SYV4 | 7,16 | 4  | 189,63  |
| Alpha-2-macroglobulin receptor-associated protein                      | Q99068 | 6,85 | 1  | 61,80   |
| Alpha-actinin-1                                                        | Q3B7N2 | 5,25 | 17 | 655,82  |
| Alpha-actinin-2                                                        | Q9JI91 | 5,36 | 8  | 172,74  |
| Alpha-actinin-4                                                        | O43707 | 5,27 | 9  | 301,01  |
| Alpha-crystallin B chain                                               | Q7M2W6 | 6,76 | 7  | 287,16  |
| Alpha-enolase                                                          | Q9XSJ4 | 6,37 | 7  | 200,23  |
| Ankyrin repeat domain-containing protein 35                            | Q8N283 | 5,76 | 4  | 95,36   |
| Annexin A5                                                             | Q5RIW0 | 4,94 | 6  | 441,80  |
| Arf-GAP with SH3 domain, ANK repeat and PH domain-containing protein 2 | Q7SIG6 | 6,22 | 3  | 56,79   |
| Astrocytic phosphoprotein PEA-15                                       | Q15121 | 4,93 | 4  | 106,50  |
| ATP synthase protein 8                                                 | Q35914 | 9,16 | 1  | 44,56   |
| ATP synthase subunit alpha, mitochondrial                              | Q03265 | 9,22 | 5  | 91,80   |
| ATP synthase subunit beta, mitochondrial                               | P00829 | 5,15 | 1  | 51,56   |
| ATP synthase subunit e, mitochondrial                                  | Q9MYT8 | 9,3  | 3  | 107,51  |
| ATP synthase-coupling factor 6, mitochondrial                          | P13618 | 5,41 | 2  | 123,62  |
| ATPase inhibitor, mitochondrial                                        | Q29307 | 9,34 | 3  | 187,43  |
| Atrial natriuretic peptide-converting enzyme                           | Q80YN4 | 5,18 | 2  | 60,03   |
| Baculoviral IAP repeat-containing protein 5                            | Q9JHY7 | 5,85 | 2  | 52,79   |
| Barrier-to-autointegration factor                                      | O75531 | 5,81 | 3  | 212,75  |
| Beta-actin-like protein 2                                              | Q8BFZ3 | 5,3  | 7  | 334,12  |
| Beta-glucuronidase                                                     | O97524 | 6,13 | 5  | 103,03  |
| Beta-lactoglobulin                                                     | P02756 | 5,5  | 1  | 57,92   |
| Bromodomain testis-specific protein                                    | Q4R8Y1 | 9,23 | 6  | 117,59  |
| C2 domain-containing protein 3                                         | Q4AC94 | 6,65 | 6  | 88,76   |
| Calcium-regulated heat stable protein 1                                | Q9CR86 | 8,41 | 1  | 87,90   |
| Caldesmon                                                              | Q05682 | 5,63 | 27 | 1024,06 |
| Calmodulin                                                             | P62158 | 4,09 | 2  | 151,18  |
| Calpastatin                                                            | P12675 | 5,21 | 6  | 180,61  |
| Calponin-1                                                             | Q08092 | 8,91 | 12 | 427,15  |

|                                                                    |        |      |    |        |
|--------------------------------------------------------------------|--------|------|----|--------|
| Calponin-2 (Fragment)                                              | Q08094 | 8,58 | 7  | 149,00 |
| Calponin-2                                                         | Q08093 | 7,53 | 8  | 167,80 |
| Cathepsin D                                                        | Q4LAL9 | 7,97 | 4  | 89,73  |
| Cationic trypsin                                                   | P00760 | 8,4  | 4  | 281,65 |
| Cellular nucleic acid-binding protein                              | P62633 | 8    | 5  | 218,29 |
| Centromere protein F                                               | P49454 | 5,03 | 15 | 168,42 |
| Chloride intracellular channel protein 4                           | Q9QYB1 | 5,44 | 3  | 76,64  |
| Chloride intracellular channel protein 6                           | Q811Q2 | 4,29 | 2  | 55,57  |
| Cingulin                                                           | B0KWC9 | 5,46 | 7  | 128,90 |
| Clathrin light chain A                                             | O08585 | 4,45 | 2  | 60,82  |
| Clathrin light chain B                                             | P09497 | 4,57 | 3  | 109,92 |
| Cofilin-1                                                          | Q4R5C0 | 8,16 | 5  | 133,69 |
| Coiled-coil domain-containing protein 88B                          | A6NC98 | 5,09 | 5  | 80,69  |
| Collagen alpha-1(I) chain                                          | Q9XSJ7 | 5,67 | 20 | 805,18 |
| Collagen alpha-1(III) chain                                        | P08121 | 6,11 | 7  | 148,66 |
| Collagen alpha-2(I) chain                                          | O46392 | 9,18 | 8  | 205,45 |
| Collagen alpha-5(VI) chain                                         | A8TX70 | 6,5  | 7  | 99,08  |
| Core histone macro-H2A.1                                           | Q9QZQ8 | 9,81 | 4  | 101,69 |
| Cysteine and glycine-rich protein 1                                | Q3MHY1 | 8,91 | 5  | 250,93 |
| Cysteine and glycine-rich protein 2                                | Q16527 | 8,95 | 2  | 56,94  |
| Cytochrome b-c1 complex subunit 6, mitochondrial                   | Q5M9I5 | 4,9  | 1  | 75,78  |
| Cytochrome c oxidase subunit 4 isoform 1, mitochondrial (Fragment) | Q95283 | 9,37 | 2  | 98,80  |
| Cytochrome c oxidase subunit 4 isoform 1, mitochondrial            | P19783 | 9,25 | 1  | 45,48  |
| Cytochrome c oxidase subunit 5A, mitochondrial                     | B0VYY4 | 6,42 | 2  | 66,43  |
| Cytochrome c oxidase subunit 6B1                                   | P00429 | 8,76 | 3  | 123,65 |
| Dermcidin                                                          | P81605 | 6,08 | 3  | 195,61 |
| Desmin                                                             | P02540 | 5,21 | 7  | 208,70 |
| Desmoglein-1                                                       | Q02413 | 4,9  | 3  | 63,65  |
| Desmoplakin                                                        | P15924 | 6,44 | 20 | 309,97 |
| Dihydrolipoyl dehydrogenase, mitochondrial (Fragment)              | Q811C4 | 6,94 | 4  | 83,49  |
| Dihydropyrimidinase-related protein 2                              | P47942 | 5,95 | 5  | 106,45 |
| Dimethyladenosine transferase 1, mitochondrial                     | Q811P6 | 9,57 | 4  | 99,57  |

|                                                               |        |      |    |         |
|---------------------------------------------------------------|--------|------|----|---------|
| DNA-binding protein A                                         | P16989 | 9,77 | 12 | 450,60  |
| DNA-dependent protein kinase catalytic subunit                | P78527 | 6,75 | 12 | 137,52  |
| DnaJ homolog subfamily C member 8                             | Q6NZB0 | 9,04 | 1  | 42,63   |
| E3 ubiquitin-protein ligase SHPRH                             | Q149N8 | 7,3  | 5  | 91,71   |
| EF-hand calcium-binding domain-containing protein 3           | Q8N7B9 | 9,31 | 2  | 58,78   |
| Elongation factor 1-alpha 1                                   | P62629 | 9,1  | 2  | 48,85   |
| Elongation factor 1-alpha 2                                   | Q05639 | 9,11 | 3  | 83,65   |
| Elongation factor 1-beta                                      | P29412 | 4,57 | 2  | 50,91   |
| Elongation factor 2                                           | P09445 | 6,22 | 6  | 143,08  |
| Endoplasmic reticulum resident protein 29                     | P57759 | 5,9  | 2  | 65,90   |
| Enhancer of rudimentary homolog                               | P84090 | 5,63 | 4  | 109,40  |
| Eukaryotic translation initiation factor 1                    | P41567 | 6,89 | 3  | 61,34   |
| Eukaryotic translation initiation factor 3 subunit J          | O75822 | 4,72 | 1  | 41,61   |
| Eukaryotic translation initiation factor 4B                   | Q8BGD9 | 5,47 | 6  | 135,11  |
| Eukaryotic translation initiation factor 4E-binding protein 1 | Q13541 | 5,32 | 2  | 65,56   |
| Eukaryotic translation initiation factor 5A-1                 | P63241 | 5,08 | 3  | 150,38  |
| Ezrin                                                         | P15311 | 5,94 | 7  | 141,33  |
| FH1/FH2 domain-containing protein 1                           | Q6P9Q4 | 5,93 | 1  | 57,57   |
| Fibronectin                                                   | P07589 | 5,33 | 36 | 1450,92 |
| Filaggrin-2                                                   | Q5D862 | 8,45 | 7  | 117,60  |
| Filamin-A                                                     | P21333 | 5,7  | 58 | 2520,15 |
| Filamin-B                                                     | O75369 | 5,47 | 14 | 302,52  |
| Filamin-binding LIM protein 1                                 | Q5REN1 | 5,9  | 5  | 187,44  |
| Filamin-C                                                     | Q14315 | 5,65 | 15 | 475,81  |
| Four and a half LIM domains protein 1                         | Q9WUH4 | 8,76 | 3  | 64,07   |
| Galectin-1                                                    | Q49I35 | 4,99 | 7  | 396,14  |
| Gamma-enolase                                                 | P17183 | 4,99 | 5  | 159,50  |
| Glia maturation factor beta                                   | P60983 | 5,19 | 1  | 46,72   |
| Glial fibrillary acidic protein                               | Q5RA72 | 5,42 | 5  | 176,08  |
| Glyceraldehyde-3-phosphate dehydrogenase                      | A3FKF7 | 8,2  | 5  | 123,16  |
| H/ACA ribonucleoprotein complex subunit 2                     | Q5E950 | 8,43 | 2  | 61,07   |
| Heat shock 70 kDa protein 1A/1B                               | Q07439 | 5,61 | 4  | 101,67  |
| Heat shock 70 kDa protein 1-like                              | P55063 | 5,91 | 4  | 116,51  |

|                                                |        |       |    |        |
|------------------------------------------------|--------|-------|----|--------|
| Heat shock 70 kDa protein 6                    | Q04967 | 5,77  | 4  | 111,17 |
| Heat shock cognate 71 kDa protein              | P19378 | 5,24  | 11 | 285,93 |
| Heat shock protein beta-1                      | Q5S1U1 | 6,23  | 12 | 695,55 |
| Heat shock protein beta-6                      | O14558 | 5,95  | 3  | 108,47 |
| Heat shock-related 70 kDa protein 2            | P34933 | 5,44  | 6  | 131,23 |
| Hemoglobin subunit alpha                       | P01965 | 8,76  | 1  | 41,61  |
| Heterogeneous nuclear ribonucleoprotein A/B    | Q99729 | 8,22  | 4  | 216,13 |
| Heterogeneous nuclear ribonucleoprotein A1     | P04256 | 9,2   | 9  | 452,20 |
| Heterogeneous nuclear ribonucleoprotein A3     | Q8BG05 | 9,1   | 5  | 171,78 |
| Heterogeneous nuclear ribonucleoprotein C      | Q5RA82 | 4,95  | 3  | 91,87  |
| Heterogeneous nuclear ribonucleoprotein G      | A5A6M3 | 10,06 | 16 | 405,88 |
| Heterogeneous nuclear ribonucleoprotein K      | P61978 | 5,39  | 5  | 147,81 |
| Heterogeneous nuclear ribonucleoproteins A2/B1 | P22626 | 8,97  | 8  | 365,95 |
| High mobility group protein B1                 | B0CM99 | 5,62  | 8  | 381,36 |
| High mobility group protein B2                 | P26583 | 7,62  | 6  | 186,38 |
| High mobility group protein HMG-I/HMG-Y        | Q9QXP3 | 10,32 | 2  | 66,89  |
| Histone H1.2                                   | P15864 | 11    | 8  | 324,72 |
| Histone H1.3                                   | P43277 | 11,03 | 8  | 336,29 |
| Histone H1.4                                   | P43274 | 11,1  | 5  | 225,41 |
| Histone H1.5                                   | P16401 | 10,91 | 5  | 102,16 |
| Histone H1t                                    | P06348 | 11,58 | 5  | 230,38 |
| Histone H2A type 1-A                           | Q96QV6 | 10,86 | 6  | 267,13 |
| Histone H2A type 1-H                           | Q96KK5 | 10,88 | 7  | 396,53 |
| Histone H2A type 4                             | Q00728 | 11,02 | 6  | 372,72 |
| Histone H2A.V                                  | Q71UI9 | 10,58 | 4  | 246,04 |
| Histone H2A.x                                  | P16104 | 10,74 | 5  | 244,33 |
| Histone H2B type 1-A                           | P70696 | 10,29 | 5  | 222,44 |
| Histone H2B type 1-J                           | P06899 | 10,31 | 6  | 390,61 |
| Histone H2B type 1-L                           | Q99880 | 10,31 | 7  | 424,47 |
| Histone H2B type 1-N                           | Q32L48 | 10,31 | 6  | 351,51 |
| Histone H2B type 3-B                           | Q8N257 | 10,31 | 6  | 353,53 |
| Histone H3.1                                   | P68431 | 11,13 | 10 | 370,62 |
| Histone H3.3                                   | Q5E9F8 | 11,27 | 10 | 344,63 |

|                                                             |        |       |    |         |
|-------------------------------------------------------------|--------|-------|----|---------|
| Histone H3.3C                                               | Q3SZB8 | 10,9  | 5  | 168,32  |
| Histone H4                                                  | P62805 | 11,36 | 9  | 503,84  |
| Hornerin                                                    | Q86YZ3 | 10,05 | 15 | 418,90  |
| Hyaluronan mediated motility receptor                       | O75330 | 5,68  | 5  | 93,61   |
| Immunity-related GTPase family M protein 1                  | Q60766 | 8,56  | 2  | 55,17   |
| Immunity-related GTPase family M protein                    | Q6AYC2 | 8,39  | 1  | 51,35   |
| Integrin beta-1                                             | Q9GLP0 | 5,32  | 7  | 294,46  |
| Interferon-induced protein with tetratricopeptide repeats 2 | Q60462 | 8,73  | 2  | 53,05   |
| Interleukin-10                                              | P18893 | 8,44  | 1  | 41,80   |
| Interleukin-2                                               | P36835 | 6,73  | 1  | 42,11   |
| Jerky protein homolog-like                                  | Q9Y4A0 | 8,25  | 1  | 42,76   |
| Keratin, type I cytoskeletal 10                             | P13645 | 5,13  | 25 | 1238,78 |
| Keratin, type I cytoskeletal 12 (Fragment)                  | Q28706 | 4,63  | 5  | 206,33  |
| Keratin, type I cytoskeletal 13                             | P08730 | 4,79  | 6  | 248,86  |
| Keratin, type I cytoskeletal 14                             | P02533 | 5,09  | 24 | 954,47  |
| Keratin, type I cytoskeletal 16                             | P08779 | 4,99  | 23 | 940,42  |
| Keratin, type I cytoskeletal 17                             | Q04695 | 4,97  | 17 | 608,01  |
| Keratin, type I cytoskeletal 18                             | P05784 | 5,22  | 5  | 142,18  |
| Keratin, type I cytoskeletal 19                             | Q63279 | 5,21  | 12 | 373,88  |
| Keratin, type I cytoskeletal 20                             | P35900 | 5,52  | 4  | 116,82  |
| Keratin, type I cytoskeletal 25                             | Q0P5J4 | 4,97  | 6  | 163,23  |
| Keratin, type I cytoskeletal 27                             | Q6R649 | 4,97  | 4  | 74,57   |
| Keratin, type I cytoskeletal 28                             | Q7Z3Y7 | 5,33  | 4  | 101,12  |
| Keratin, type I cytoskeletal 42                             | Q6IFX2 | 5,09  | 16 | 472,27  |
| Keratin, type I cytoskeletal 9                              | P35527 | 5,14  | 31 | 1787,90 |
| Keratin, type II cytoskeletal 1                             | P04264 | 8,15  | 36 | 2881,99 |
| Keratin, type II cytoskeletal 1b                            | Q6IFZ6 | 7,74  | 10 | 472,26  |
| Keratin, type II cytoskeletal 3                             | Q29426 | 7,6   | 13 | 408,11  |
| Keratin, type II cytoskeletal 4                             | P19013 | 6,25  | 7  | 271,87  |
| Keratin, type II cytoskeletal 5                             | P13647 | 7,59  | 24 | 1148,82 |
| Keratin, type II cytoskeletal 6A                            | P02538 | 8,09  | 26 | 1298,21 |
| Keratin, type II cytoskeletal 6B                            | P04259 | 8,09  | 23 | 1239,98 |
| Keratin, type II cytoskeletal 7                             | Q29S21 | 5,79  | 11 | 436,14  |

|                                                                     |        |      |    |        |
|---------------------------------------------------------------------|--------|------|----|--------|
| Keratin, type II cytoskeletal 71                                    | Q9R0H5 | 6,6  | 5  | 223,84 |
| Keratin, type II cytoskeletal 72                                    | Q6IG04 | 7,05 | 4  | 142,51 |
| Keratin, type II cytoskeletal 73                                    | Q6NXH9 | 8,36 | 10 | 440,37 |
| Keratin, type II cytoskeletal 74                                    | Q7RTS7 | 7,59 | 8  | 244,62 |
| Keratin, type II cytoskeletal 75                                    | Q08D91 | 7,56 | 14 | 522,10 |
| Keratin, type II cytoskeletal 79                                    | Q148H7 | 7,1  | 12 | 482,86 |
| Keratin, type II cytoskeletal 8                                     | Q10758 | 5,83 | 13 | 463,18 |
| Keratin, type II cytoskeletal 80                                    | A0JND2 | 5,23 | 2  | 112,27 |
| Keratin-like protein KRT222                                         | Q8CCX5 | 5,6  | 2  | 57,41  |
| Keratinocyte proline-rich protein                                   | Q5T749 | 8,72 | 8  | 220,52 |
| Kinesin-like protein KIF2B                                          | A6H750 | 9,3  | 4  | 86,88  |
| Kit ligand                                                          | P79169 | 5,88 | 1  | 41,41  |
| Lamina-associated polypeptide 2, isoform alpha                      | P42166 | 7,56 | 4  | 104,53 |
| Leucine-rich repeat-containing protein 59                           | Q5RJR8 | 9,57 | 4  | 112,02 |
| LIM and SH3 domain protein 1                                        | Q99MZ8 | 6,61 | 13 | 647,35 |
| Liprin-alpha-2                                                      | Q8BSS9 | 5,79 | 5  | 76,78  |
| Lysosomal alpha-mannosidase                                         | Q29451 | 9,2  | 6  | 136,73 |
| Macrophage migration inhibitory factor                              | Q4R549 | 7,74 | 1  | 43,27  |
| MAM domain-containing glycosylphosphatidylinositol anchor protein 2 | P60755 | 6,65 | 3  | 82,31  |
| Membrane-associated progesterone receptor component 1               | O00264 | 4,56 | 2  | 79,79  |
| Membrane-associated progesterone receptor component 2               | O15173 | 4,76 | 2  | 64,23  |
| Microtubule-associated protein 4                                    | P27546 | 4,9  | 4  | 87,23  |
| Microtubule-associated protein RP/EB family member 1                | Q3ZBD9 | 5,2  | 3  | 62,75  |
| Mitochondrial import inner membrane translocase subunit Tim13       | P62076 | 8,42 | 2  | 67,29  |
| Mitochondrial import inner membrane translocase subunit Tim8 A      | O60220 | 5,09 | 2  | 98,60  |
| Mitochondrial import inner membrane translocase subunit Tim9        | Q9Y5J7 | 6,71 | 3  | 146,69 |
| Moesin                                                              | P26042 | 6,3  | 11 | 234,18 |
| Myeloperoxidase                                                     | P05164 | 9,19 | 3  | 51,88  |
| Myosin heavy chain, embryonic smooth muscle isoform (Fragment)      | Q99105 | 5,27 | 5  | 172,93 |
| Myosin light chain 1/3, skeletal muscle isoform                     | P02602 | 4,97 | 2  | 66,70  |
| Myosin light chain 3                                                | P16409 | 5,03 | 5  | 177,94 |



|                                                                      |        |      |    |         |
|----------------------------------------------------------------------|--------|------|----|---------|
| Myosin light polypeptide 6                                           | P60660 | 4,56 | 6  | 338,89  |
| Myosin regulatory light chain 12A                                    | Q5RC34 | 4,67 | 5  | 214,14  |
| Myosin regulatory light polypeptide 9                                | Q9CQ19 | 4,8  | 3  | 91,01   |
| Myosin-10                                                            | Q27991 | 5,44 | 15 | 535,44  |
| Myosin-11                                                            | P35748 | 5,39 | 10 | 218,89  |
| Myosin-14                                                            | Q6URW6 | 5,49 | 8  | 178,64  |
| Myosin-9                                                             | Q258K2 | 5,5  | 36 | 1419,56 |
| Myotrophin                                                           | Q863Z4 | 5,27 | 3  | 135,69  |
| N6-adenosine-methyltransferase 70 kDa subunit                        | Q8C3P7 | 6,05 | 2  | 59,61   |
| N-acetylglucosamine-6-sulfatase                                      | P50426 | 8,54 | 3  | 175,62  |
| NACHT, LRR and PYD domains-containing protein 3                      | Q96P20 | 6,22 | 3  | 57,14   |
| NADH dehydrogenase [ubiquinone] iron-sulfur protein 8, mitochondrial | Q60HE3 | 6,45 | 2  | 57,49   |
| Nesprin-1                                                            | Q6ZWR6 | 5,43 | 15 | 165,76  |
| Neuroblast differentiation-associated protein AHNAK                  | Q09666 | 5,8  | 37 | 1035,38 |
| Nexilin                                                              | Q0ZGT2 | 5,31 | 3  | 71,32   |
| Non-muscle caldesmon                                                 | Q62736 | 6,34 | 20 | 781,92  |
| Nuclear ubiquitous casein and cyclin-dependent kinases substrate     | Q9H1E3 | 5    | 4  | 174,95  |
| Nuclease-sensitive element-binding protein 1                         | P67809 | 9,87 | 18 | 754,39  |
| Nucleobindin-1                                                       | Q63083 | 5,04 | 4  | 122,12  |
| Nucleolin                                                            | P08199 | 4,7  | 5  | 149,63  |
| Nucleophosmin                                                        | Q3T160 | 4,62 | 5  | 106,06  |
| P protein                                                            | Q04671 | 6,84 | 1  | 64,14   |
| Palladin                                                             | Q8WX93 | 6,67 | 5  | 90,24   |
| PDZ and LIM domain protein 1                                         | Q5E9E1 | 6,76 | 6  | 313,19  |
| PDZ and LIM domain protein 7                                         | Q3TJD7 | 8,82 | 4  | 79,71   |
| Peptidyl-prolyl cis-trans isomerase A                                | P62936 | 8,34 | 6  | 286,32  |
| Peptidylprolyl cis-trans isomerase A-like 4A/B/C                     | Q9Y536 | 9,32 | 2  | 73,63   |
| Peptidyl-prolyl cis-trans isomerase FKBP10                           | Q2HJ89 | 5,56 | 5  | 178,80  |
| Peptidyl-prolyl cis-trans isomerase FKBP7                            | Q5RET2 | 6,11 | 3  | 70,91   |
| Pericentrin                                                          | P48725 | 5,27 | 8  | 119,91  |
| Peroxiredoxin-1                                                      | Q5E947 | 8,59 | 4  | 198,23  |
| Peroxiredoxin-4                                                      | Q13162 | 5,86 | 1  | 76,84   |



|                                                        |        |       |    |        |
|--------------------------------------------------------|--------|-------|----|--------|
| Phosphatidylinositol 3-kinase regulatory subunit alpha | Q63787 | 5,9   | 3  | 88,79  |
| Phosphoglycerate mutase 1                              | P18669 | 6,67  | 10 | 480,54 |
| Plasminogen activator inhibitor 1 RNA-binding protein  | Q8NC51 | 8,66  | 9  | 363,60 |
| Polyadenylate-binding protein 1                        | P11940 | 9,52  | 4  | 133,68 |
| Polyadenylate-binding protein 3                        | Q9H361 | 9,68  | 6  | 142,05 |
| POTE ankyrin domain family member E                    | Q6S8J3 | 5,83  | 8  | 492,81 |
| POTE ankyrin domain family member I                    | P0CG38 | 5,83  | 7  | 393,88 |
| Prefoldin subunit 2                                    | Q9UHV9 | 6,2   | 2  | 87,89  |
| Prelamin-A/C                                           | Q3ZD69 | 6,73  | 9  | 307,39 |
| Proactivator polypeptide                               | P07602 | 5,06  | 6  | 190,90 |
| Profilin-1                                             | P62962 | 8,46  | 3  | 153,00 |
| Programmed cell death protein 5                        | P56812 | 5,55  | 4  | 160,52 |
| Proteasome activator complex subunit 1                 | Q06323 | 5,78  | 4  | 178,09 |
| Proteasome activator complex subunit 2                 | Q5E9G3 | 5,31  | 1  | 45,47  |
| Proteasome subunit beta type-1                         | Q2TBX6 | 8,26  | 3  | 77,00  |
| Protein canopy homolog 2                               | Q9QXT0 | 4,95  | 3  | 142,54 |
| Protein canopy homolog 4                               | Q3SWX1 | 4,71  | 1  | 66,17  |
| Protein disulfide-isomerase A3                         | P30101 | 5,98  | 16 | 757,49 |
| Protein disulfide-isomerase A6                         | P38660 | 5,04  | 2  | 68,78  |
| Protein disulfide-isomerase                            | P05307 | 4,8   | 8  | 320,67 |
| Protein enabled homolog                                | Q03173 | 7,62  | 5  | 163,76 |
| Protein piccolo                                        | Q9Y6V0 | 6,12  | 9  | 124,09 |
| Protein S100-A11                                       | P31950 | 6,07  | 2  | 86,63  |
| Protein S100-A2                                        | P10462 | 4,68  | 2  | 74,26  |
| Protein transport protein Sec61 subunit beta           | P60468 | 11,57 | 1  | 62,17  |
| Putative high mobility group protein B1-like 1         | B2RPK0 | 5,92  | 3  | 98,52  |
| Putative histone H2B type 2-D                          | Q6DRA6 | 10,6  | 3  | 114,00 |
| Putative tropomyosin alpha-3 chain-like protein        | A6NL28 | 4,47  | 2  | 70,45  |
| PX domain-containing protein kinase-like protein       | Q4FZZ1 | 9,5   | 5  | 91,29  |
| Radixin                                                | Q32LP2 | 5,95  | 5  | 133,88 |
| Regulator of nonsense transcripts 3A                   | Q9H1J1 | 9,12  | 2  | 81,26  |
| Reticulocalbin-3                                       | Q8BH97 | 4,74  | 4  | 203,78 |
| Reticulon-4                                            | Q9NQC3 | 4,43  | 3  | 67,99  |

|                                                      |        |       |    |        |
|------------------------------------------------------|--------|-------|----|--------|
| Rho GDP-dissociation inhibitor 1                     | P52565 | 5,02  | 2  | 75,89  |
| Ribosomal protein S6 kinase alpha-6                  | Q9UK32 | 5,92  | 4  | 51,42  |
| RNA methyltransferase-like protein 1                 | Q9HC36 | 8,89  | 3  | 66,74  |
| RNA-binding motif protein, X-linked-like-2           | Q4R813 | 10,28 | 4  | 100,67 |
| RNA-binding motif protein, X-linked-like-3           | Q8N7X1 | 9,19  | 8  | 123,11 |
| RNA-binding protein EWS                              | Q61545 | 9,37  | 2  | 53,17  |
| Saposin-B-Val                                        | P81405 | 4,41  | 3  | 136,45 |
| Serine/arginine-rich splicing factor 1               | Q07955 | 10,37 | 10 | 452,98 |
| Serine/arginine-rich splicing factor 10              | Q9R0U0 | 11,26 | 2  | 75,93  |
| Serine/arginine-rich splicing factor 12              | Q8WXF0 | 11,69 | 2  | 58,93  |
| Serine/arginine-rich splicing factor 2               | Q01130 | 11,86 | 3  | 81,08  |
| Serine/arginine-rich splicing factor 3               | P84103 | 11,64 | 4  | 171,94 |
| Serine/arginine-rich splicing factor 7               | Q16629 | 11,83 | 3  | 120,21 |
| Serpin H1                                            | Q5RBS3 | 8,37  | 3  | 132,37 |
| Serum albumin                                        | P08835 | 6,08  | 13 | 453,27 |
| SH3 domain-binding glutamic acid-rich-like protein 3 | Q9H299 | 4,82  | 2  | 109,52 |
| Small nuclear ribonucleoprotein Sm D3                | P62320 | 10,33 | 5  | 118,63 |
| Small ubiquitin-related modifier 2                   | Q6LDZ8 | 5,32  | 1  | 78,47  |
| Sodium/hydrogen exchanger 4                          | P26434 | 9,16  | 2  | 51,95  |
| Sorting nexin-18                                     | Q96RF0 | 5,44  | 3  | 80,75  |
| Sorting nexin-25                                     | Q3ZT31 | 5,83  | 2  | 49,37  |
| Splicing factor 1                                    | Q64213 | 8,98  | 1  | 40,00  |
| Src substrate cortactin                              | Q60598 | 5,24  | 6  | 211,60 |
| Stathmin                                             | P16949 | 5,76  | 3  | 161,63 |
| Stress-70 protein, mitochondrial                     | P48721 | 5,97  | 8  | 177,35 |
| Stress-induced-phosphoprotein 1                      | Q3ZBZ8 | 6,08  | 11 | 242,21 |
| Sulfated glycoprotein 1                              | P10960 | 5,13  | 5  | 128,60 |
| Syntaxin-7                                           | Q5R602 | 5,44  | 2  | 55,49  |
| Talin-1                                              | Q9Y490 | 5,77  | 21 | 687,40 |
| T-complex protein 1 subunit alpha                    | P11983 | 5,82  | 4  | 61,00  |
| T-complex protein 1 subunit beta                     | Q3ZBH0 | 6,18  | 6  | 155,73 |
| Tetratricopeptide repeat protein 29                  | Q4R6M4 | 5,74  | 3  | 65,57  |
| Thioredoxin                                          | P82460 | 4,97  | 9  | 546,50 |

|                                                                |        |       |    |         |
|----------------------------------------------------------------|--------|-------|----|---------|
| THO complex subunit 4                                          | Q86V81 | 11,15 | 4  | 86,58   |
| Thrombospondin-1                                               | P07996 | 4,71  | 3  | 73,40   |
| Thymosin beta-10                                               | P21753 | 6,18  | 2  | 74,74   |
| Thymosin beta-4                                                | Q6S9C5 | 5,02  | 6  | 316,95  |
| Titin                                                          | A2ASS6 | 5,91  | 68 | 502,67  |
| Transaldolase                                                  | Q2TBL6 | 7,03  | 4  | 135,61  |
| Transcription factor BTF3 homolog 4                            | Q96K17 | 5,95  | 3  | 64,90   |
| Transcription factor BTF3                                      | Q64152 | 9,52  | 2  | 85,14   |
| Transforming growth factor beta-1-induced transcript 1 protein | O43294 | 6,62  | 3  | 107,50  |
| Transgelin                                                     | Q01995 | 8,87  | 14 | 640,74  |
| Transgelin-2                                                   | Q5E9F5 | 8,39  | 13 | 699,78  |
| Translocation protein SEC63 homolog                            | Q5R660 | 5,25  | 2  | 58,88   |
| Trichohyalin                                                   | P37709 | 5,61  | 4  | 88,04   |
| Triosephosphate isomerase                                      | Q29371 | 7,01  | 10 | 393,29  |
| Tropomodulin-3                                                 | Q9NYL9 | 5,08  | 4  | 97,59   |
| Tropomyosin alpha-1 chain                                      | Q5KR49 | 4,69  | 17 | 1065,18 |
| Tropomyosin alpha-3 chain                                      | P06753 | 4,68  | 15 | 784,61  |
| Tropomyosin alpha-4 chain                                      | P67937 | 4,67  | 22 | 1199,59 |
| Tropomyosin beta chain                                         | Q5KR48 | 4,66  | 19 | 1050,71 |
| Tubulin alpha-1A chain                                         | Q71U36 | 4,94  | 2  | 70,58   |
| Ubiquilin-1                                                    | Q5R684 | 5,02  | 3  | 91,86   |
| Ubiquitin-60S ribosomal protein L40                            | P63050 | 9,87  | 2  | 66,59   |
| Ubiquitin-associated protein 2-like                            | Q80X50 | 6,61  | 1  | 44,32   |
| UV excision repair protein RAD23 homolog B                     | P54727 | 4,79  | 3  | 121,47  |
| Vacuolar protein sorting-associated protein 13C                | Q709C8 | 6,38  | 7  | 91,68   |
| Vimentin                                                       | P31000 | 5,06  | 27 | 1173,15 |
| Vinculin                                                       | P26234 | 5,62  | 24 | 744,19  |
| Voltage-dependent N-type calcium channel subunit alpha-1B      | Q02294 | 8,82  | 8  | 109,30  |
| Voltage-dependent P/Q-type calcium channel subunit alpha-1A    | P97445 | 9,03  | 7  | 123,61  |
| Xylulose kinase                                                | O75191 | 5,55  | 3  | 61,59   |
| Y-box-binding protein 2                                        | Q9Z2C8 | 10,95 | 6  | 287,70  |
| Zinc finger ZZ-type and EF-hand domain-containing protein 1    | Q5SSH7 | 5,74  | 7  | 111,43  |
| Zyxin                                                          | Q15942 | 6,22  | 3  | 92,51   |
